# Supplementary material for: A Novel Association between Lysyl Oxidase Gene Polymorphism and Intracranial Aneurysm in Koreans
Source: PubMed Central journal article supplement — Yonsei Med J. 2017 Jul 31;58(5):1006–11. doi: 10.3349/ymj.2017.58.5.1006 (PMC5552627; doi:10.3349/ymj.2017.58.5.1006), 2017-07-31
Supplement: ymj-58-1006-s001.pdf [file ymj-58-1006-s001.pdf]

**Supplementary Table 1.** Baseline Characteristics and Association Results between IA and Non-Genetic Factors

| Variables                         | IA (n=80) | Controls (n=80) | Univariate analysis |         | Multivariate analysis |         |
|-----------------------------------|-----------|-----------------|---------------------|---------|-----------------------|---------|
|                                   |           |                 | OR (95% CI)         | p value | OR (95% CI)           | p value |
| Female (%)                        | 43 (53.8) | 45 (56.3)       | 0.90 (0.48–1.69)    | 0.751   | 0.91 (0.49–1.71)      | 0.773   |
| Age (yr)                          | 57.1±12.9 | 55.9±15.3       | 1.01 (0.98–1.03)    | 0.582   | 1.00 (0.98–1.03)      | 0.711   |
| Hypertension (%)                  | 17 (21.3) | 14 (17.5)       | 1.27 (0.58–2.79)    | 0.549   | 1.21 (0.51–2.89)      | 0.660   |
| Diabetes mellitus (%)             | 6 (7.5)   | 7 (8.8)         | 0.85 (0.27–2.64)    | 0.773   | 0.70 (0.21–2.39)      | 0.574   |
| Hyperlipidemia (%)                | 8 (10.0)  | 6 (7.5)         | 1.37 (0.45–4.15)    | 0.577   | 1.38 (0.44–4.38)      | 0.579   |
| Smoking (%)                       | 8 (10.0)  | 6 (7.5)         | 1.37 (0.45–4.15)    | 0.577   | 1.34 (0.44–4.10)      | 0.612   |
| Anterior circulating aneurysm (%) | 73 (91.3) |                 |                     |         |                       |         |
| ICA/A-com or ACA                  | 15/21     |                 |                     |         |                       |         |
| MCA/P-com                         | 25/12     |                 |                     |         |                       |         |

IA, intracranial aneurysm; CI, confidence interval; ICA, internal carotid artery; A-com, anterior communicating artery; ACA, anterior cerebral artery; MCA, middle cerebral artery; OR, odds ratio; P-com, posterior communicating artery.

OR, 95% CI, and p-value were estimated from univariate and multivariate logistic regression analyses, respectively.
