# Supplementary material for: A Novel Association between Lysyl Oxidase Gene Polymorphism and Intracranial Aneurysm in Koreans
Source: PubMed Central journal article supplement — Yonsei Med J. 2017 Jul 31;58(5):1006–11. doi: 10.3349/ymj.2017.58.5.1006 (PMC5552627; doi:10.3349/ymj.2017.58.5.1006), 2017-07-31
Supplement: ymj-58-1006-s002.pdf [file ymj-58-1006-s002.pdf]

**Supplementary Table 2.** Results of 10 SNP Associations with IA under the Additive Genetic Model after Adjustment of Age, Sex, Smoking, and Three Disease Status Shown in Supplementary Table 1

| Gene Chr.     | SNP        | Position  | Function |        | M/m* | 80 patients with IA and 80 controls |                    |                   |                        | 41 IA rupture and 39 non-rupture |                   |                        |
|---------------|------------|-----------|----------|--------|------|-------------------------------------|--------------------|-------------------|------------------------|----------------------------------|-------------------|------------------------|
|               |            |           | Class    | Effect |      | MAF <sup>†</sup>                    | HWE $p^{\ddagger}$ | OR <sup>§</sup>   | $p$ value <sup>§</sup> | MAF <sup>†</sup>                 | OR <sup>§</sup>   | $p$ value <sup>§</sup> |
| LOX<br>5q23.2 | rs10040971 | 122063842 | Intron   | None   | T/C  | 0.04/0.03                           | 1.00               | 1.38 (0.41–4.67)  | 0.600                  | 0.06/0.03                        | 2.19 (0.33–14.32) | 0.414                  |
|               | rs17148773 | 122067364 | Intron   | None   | C/T  | 0.00/0.03                           | 1.00               | NA                | NA                     | 0.00/0.00                        | NA                | 1.000                  |
|               | rs3792801  | 122067715 | Intron   | None   | C/T  | 0.04/0.10                           | 1.00               | 0.36 (0.13–0.95)  | 0.040                  | 0.06/0.03                        | 2.19 (0.33–14.32) | 0.414                  |
|               | rs2303656  | 122070281 | Intron   | None   | C/A  | 0.00/0.07                           | 1.00               | NA                | NA                     | 0.00/0.00                        | NA                | NA                     |
|               | rs10519694 | 122071524 | Intron   | None   | C/T  | 0.06/0.03                           | 1.00               | 3.01 (0.88–10.33) | 0.079                  | 0.05/0.08                        | 0.62 (0.14–2.72)  | 0.524                  |
|               | rs2956540  | 122073485 | Intron   | None   | C/G  | 0.24/0.19                           | 0.73               | 1.58 (0.85–2.93)  | 0.146                  | 0.24/0.24                        | 1.00              | 1.000                  |
|               | rs1800449  | 122077513 | R158Q    | Benign | G/A  | 0.15/0.18                           | 1.00               | 0.81 (0.43–1.54)  | 0.524                  | 0.16/0.14                        | 0.86 (0.33–2.21)  | 0.753                  |
|               | rs3853401  | 122081992 | 5–4 kb   | None   | C/T  | 0.06/0.07                           | 1.00               | 0.83 (0.31–2.21)  | 0.713                  | 0.04/0.08                        | 0.44 (0.06–2.25)  | 0.324                  |
|               | rs3900446  | 122090980 | 5–13 kb  | None   | T/C  | 0.11/0.01                           | 1.00               | 5.48 (1.20–25.07) | 0.028                  | 0.07/0.15                        | 0.66 (0.29–1.50)  | 0.324                  |
|               | rs763497   | 122091535 | 5–13 kb  | None   | A/G  | 0.24/0.13                           | 1.00               | 2.01 (1.14–1.55)  | 0.016                  | 0.22/0.27                        | 0.77 (0.38–1.56)  | 0.465                  |

IA, intracranial aneurysm; Chr., chromosome; CI, confidence interval; IA, intracranial aneurysm; NA, not available; OR, odds ratio; MAF, minor allele frequency; HWE, Hardy-Weinberg equilibrium.

\*Major/minor allele type, <sup>†</sup>MAF in case (left) and control (right) groups, <sup>‡</sup>HWE  $p$ -value in control group.
